# Supplementary material
Source: PubMed Central journal article supplement (PMC3121395)
Supplement: supp_M110.217372_supplemental_information.pdf [file supp_M110.217372_supplemental_information.pdf]

**Table S1 Primers used for cloning components of *CtXyl5A* and for the mutagenesis of *CtCBM62***

| Protein                       | Primers | Sequence (5'-3')                   |
|-------------------------------|---------|------------------------------------|
| <i>CtCBM62</i>                | Forward | CTCGCTAGCTATCCTAAACTTACGG          |
|                               | Reverse | CACCTCGAGATGCACATCATCATTC          |
| CBM6-CBM13-Fn3- <i>CtCBMX</i> | Forward | CTCGCTAGCACGGATTCGGTGAATG          |
|                               | Reverse | CACCTCGAGATGCACATCATCATTC          |
| W754A                         | Forward | GGAACCCAAGGTTCCGGCGAATAACATTGGG    |
|                               | Reverse | CCCAATGTTATTCGCCGAACCTTGGGTTC      |
| F772A                         | Forward | GGTGACCTGAACACGGCTTTTGACGGTCTT     |
|                               | Reverse | AGGACCGTCAAAGCCGTGTTTCAGGTCACC     |
| D774A                         | Forward | GAACACGTTTTTTGCCCCGGCCACAGCAAACGG  |
|                               | Reverse | CCGTTTGCTGTGGGCCCCGGCAAAAATGTGTTC  |
| W780A                         | Forward | CAGCAAACGGCTGCGCGCTGGGACTGGATTTTG  |
|                               | Reverse | CAAAATCCAGTCCCAGCGCGCAGCCGTTTGCTG  |
| D786A                         | Forward | TGGCTGGGACTGGCTTTTGGGGAAGGTGTG     |
|                               | Reverse | CACACCTTCCCCAAAAGCCAGTCCCAGCCA     |
| E789A                         | Forward | GGAATGGATTTTGGGGCAGGTGTGAGGAATGTC  |
|                               | Reverse | GACATTCTCACACCTGCCCAAAAATCCAGTCC   |
| R803A                         | Forward | ATTAAATTCTGCCCGGCGTCCGGCTATGAACAG  |
|                               | Reverse | CTGTTTCATAGCCGGACGCCGGGCAGAAATTAAT |
| Y806A                         | Forward | GCCCGCGTTCGGGCTATGAACAGCGCATGATAG  |
|                               | Reverse | CTATCATGCGCTGTTTCATAGCCGGAACGCGGGC |
| R809A                         | Forward | CCGGCTATGAACAGCGCATGATAGGGGGAATT   |
|                               | Reverse | AATCCCCCTGTCATGCGCTGTTTCATAGCCGG   |
| Q816A                         | Forward | GGGGGAATTTTTCGGGGGCAAATAAAG        |
|                               | Reverse | CTTTATTTGCCCCCGCAAAAATTCCCCC       |
| E85A                          | Forward | GGGGCAAATAAAGCAGAATTCAGCGATGC      |
|                               | Reverse | GCATCGCTGAATTCTGCTTTATTTGCCCC      |
| F821A                         | Forward | GCAAATAAAGAAGATGCTAGCGATGCAGTG     |
|                               | Reverse | CACTGCATCGCTGGCATCTTCTTTATTTGC     |
| R853A                         | Forward | TTCCGCTATGTCGCGTATTTGTCCCCGGAC     |
|                               | Reverse | GTCCGGGGACAAATACGCGACATAGCGGAA     |
| N866A                         | Forward | CCGACGGCAGTGCTGGAAATATTGCA         |
|                               | Reverse | TGCAATATTTCCAGCACTGCCGTCCGG        |

Table S2

## Crystal and structure statistics of CtCBM62

|                                       | CtCBM62<br>SeMet                           | CtCBM62<br>Native                          | CtCBM62/<br>Xyloglucan<br>oligosaccharide | CtCBM62/GM3                             | CtCBM62/arabinose                       |
|---------------------------------------|--------------------------------------------|--------------------------------------------|-------------------------------------------|-----------------------------------------|-----------------------------------------|
| <b>Data collection</b>                |                                            |                                            |                                           |                                         |                                         |
| Space group                           | F2 <sub>3</sub>                            | F2 <sub>3</sub>                            | F2 <sub>3</sub>                           | F2 <sub>3</sub>                         | F2 <sub>3</sub>                         |
| cell dimensions<br><i>a, b, c</i> (Å) | <i>a</i> = <i>b</i> = <i>c</i> =<br>191.39 | <i>a</i> = <i>b</i> = <i>c</i> =<br>192.39 | <i>a</i> = <i>b</i> = <i>c</i> = 191.68   | <i>a</i> = <i>b</i> = <i>c</i> = 191.35 | <i>a</i> = <i>b</i> = <i>c</i> = 191.79 |
| Resolution (Å)                        | 42.80 - 2.49<br>(2.62-2.49)                | 22.22-1.70<br>(1.79-1.70)                  | 110.43-1.75<br>(1.80-1.75)                | 39.07-1.70<br>(1.79-1.70)               | 30.29-2.00<br>(2.10-2.00)               |
| $R_{\text{merge}}$<br>$I / \sigma I$  | 0.159 (0.613)<br>33.9 (5.6)                | 0.182 (0.528)<br>10.7 (2.1)                | 0.140 (0.851)<br>13.2 (1.9)               | 0.146 (0.895)<br>14.0 (1.8)             | 0.121 (0.736)<br>16.9 (1.8)             |
| completeness (%)                      | 99.8 (98.6)                                | 100.0 (100.0)                              | 100.0 (100.0)                             | 100.0 (100.0)                           | 99.8 (99.4)                             |
| Redundancy                            | 27.5 (22.8)                                | 8.3 (8.2)                                  | 7.3 (7.0)                                 | 7.4 (7.2)                               | 5.9 (5.0)                               |
| Anomalous<br>completeness (%)         | 99.7 (98.0)                                |                                            |                                           |                                         |                                         |
| Anomalous<br>redundancy               | 14.0 (11.5)                                |                                            |                                           |                                         |                                         |
| <b>Refinement</b>                     |                                            |                                            |                                           |                                         |                                         |
| No. reflections                       | -                                          | 64559 (9370)                               | 55596 (4087)                              | 63488 (9198)                            | 39402 (5705)                            |
| $R_{\text{work}} / R_{\text{free}}$   | -                                          | 0.189/0.204                                | 0.181/0.199                               | 0.176/0.194                             | 0.226/0.243                             |
| No. Atoms                             |                                            |                                            |                                           |                                         |                                         |
| Protein                               | -                                          | 2254                                       | 2199                                      | 2165                                    | 2118                                    |
| Ligand / Ion                          | -                                          | 0/2                                        | 52/2                                      | 37/2                                    | 20/2                                    |
| Water                                 | -                                          | 480                                        | 416                                       | 503                                     | 135                                     |
| <i>B</i> -factor                      |                                            |                                            |                                           |                                         |                                         |
| Protein                               | -                                          | 9                                          | 13                                        | 15                                      | 18                                      |
| Ligand / Ion                          | -                                          | 7                                          | 36                                        | 35                                      | 33                                      |
| Water                                 | -                                          | 25                                         | 35                                        | 36                                      | 38                                      |
| R.m.s. <sup>b</sup><br>deviations     |                                            |                                            |                                           |                                         |                                         |
| Bond lengths<br>(Å)                   |                                            | 0.012                                      | 0.012                                     | 0.011                                   | 0.017                                   |
| Bond angles<br>(°)                    |                                            | 1.49                                       | 1.34                                      | 1.23                                    | 1.49                                    |

**Table S3 Affinity of variants of CtCBM62 for xyloglucan**

| Variants of CtCBM62                                                              | Mutation(s) introduced | Affinity ( $K_A \times 10^4 M^{-1}$ ) for xyloglucan |            |
|----------------------------------------------------------------------------------|------------------------|------------------------------------------------------|------------|
|                                                                                  |                        | 5 mM calcium                                         | 10 mM EDTA |
| Wild type                                                                        | No mutation            | 177                                                  | 0.71       |
| Mutants in the calcium binding site                                              | D130                   | 126                                                  | 0.81       |
|                                                                                  | D766A                  | 151                                                  | 1.10       |
|                                                                                  | D766A/T771A            | 232                                                  | 0.58       |
|                                                                                  | D766A/T771A/E869A      | 102                                                  | 1.2        |
|                                                                                  | E869A                  | 168                                                  | 0.30       |
| Mutants of residues at the interface of the two molecules in the asymmetric unit | K799A                  | 91                                                   | 0.54       |
|                                                                                  | T840A                  | 241                                                  | 1.7        |
|                                                                                  | Q871A                  | 106                                                  | 0.91       |
|                                                                                  | N770A                  | 117                                                  | 0.41       |
| Mutants of Aspartates and Glutamates on the surface of the protein               | D825A                  | 192                                                  | 3.2        |
|                                                                                  | D861A                  | 81                                                   | 0.73       |
|                                                                                  | D822A                  | 100                                                  | 0.81       |
|                                                                                  | E821A                  | 158                                                  | 0.64       |
|                                                                                  | D768A                  | 252                                                  | 0.81       |
|                                                                                  | D774A                  | 103                                                  | 0.21       |
|                                                                                  | D786A                  | 79                                                   | 0.45       |
|                                                                                  | E805A                  | 157                                                  | 1.6        |
|                                                                                  | D845A                  | 123                                                  | 0.17       |
|                                                                                  | E789A                  | 145                                                  | 0.21       |

The affinity of the mutants for xyloglucan was determined by ITC

### **Figure S1 Structure of *Ct*CBM62 in complex with arabinose**

*Panel A* displays the interactions between *Ct*CBM62 and arabinose, *Panel B* provides a surface representation of the ligand binding site occupied by arabinose, while *Panel C* is a schematic representation of the interaction of arabinose with the protein. Arabinose is coloured cyan while in *Panel A* the amino acids that interact with the ligand are shown in stick format with carbons coloured green, while in *Panel B*, the surface of these residues are also coloured green.

### **Figure S2 Sequence alignment of *Ct*CBM62 with related protein modules**

BLAST analysis of *Ct*CBM62, corresponding to residues 739 to 885 of *Ct*Xyl5A identified five proteins (*Panel A*) that displayed >42 % sequence identity, which are identified by their GenBank accession numbers. ABR45148.1 (*Panel B*) is an example of a group of 40 proteins that display non-contiguous similarity to *Ct*CBM62. Extensive co-linear identity (~40 %) to *Ct*CBM62, which includes the conservation of the key ligand binding residues, is evident after EFI14249 has been subject to a circular permutation event (*Panel C*). Residues that are identical in all 10 proteins are indicated by \*, while those that play a direct role in ligand recognition in *Ct*CBM62 are highlighted in green.

**A**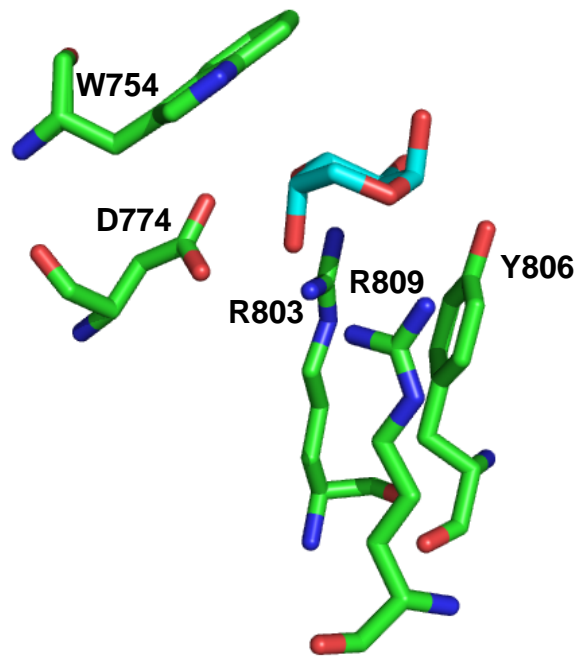**B**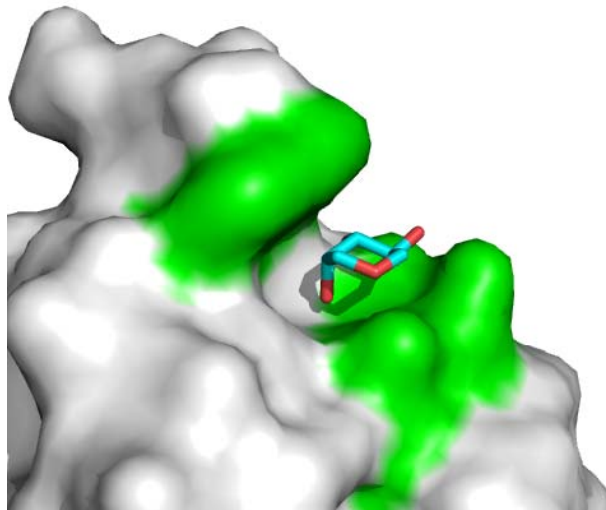**C**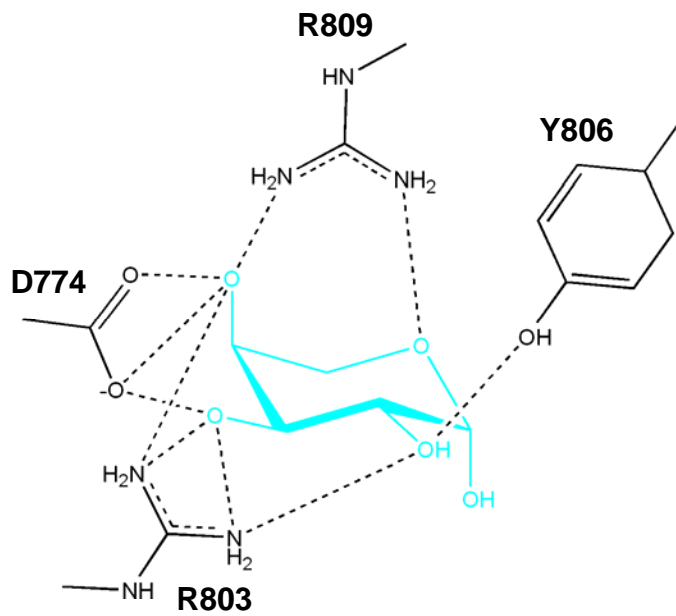

Figure S1

# A

*CtCBM62* YPKLTGTVIGTQGSWNN-IGNTIHKAFDGDLDNTFFD GPTANGCWLGLDFGEGVRNVITQI 798  
*CBK73885* YPKLTGTVIGTTGSWNN-SGNTIAKIFDNDLNSYFDAAAGSGCWAGLDFGVGVSNNVVMQI 793  
*ZP\_06143050* ---LTGTIIIGTSGSWNN-SGNTKEKAMDGSLTTFDFDAPTNGDWDVGLDLGTVNSKVISQV 109  
*ABG59655* --KVTGTQFGTSGSFGNDSSTTSKATDGNINTWSDSANANGAYTGIDLGAGNEKRIYKI 503  
*EEU61164* --KLQGTVIGTPGSWNG-SGNTREKAFDGNINTYFDAS-VDVAWTGLDLSATYK--VTTI 778  
*ABR45148* ----TARIIGTPGSWGG-MGNTCDKAMDGNIGTYFDSDDVDTNAWVGLDLGSMRATVSRI 491  
\* \* \* \* \*

*CtCBM62* KFCPRSGYEQRMIGGIFQGANKEDFSDAVTLFTITSLPGSGTLTSV-DVDNPTGFRYVRY 857  
*CBK73885* SYCPRPNFSQRMVGGIFQGANLADFSDAVTLFTITTAQPATGVL TSA-NVTNTNTFRYVRY 852  
*ZP\_06143050* RYCPRSSNEARMVGGKFGQANAADFSGAVDLYTITTAQPVTGTLT TQ-SISVTNAFRYVRY 168  
*ABG59655* RYYPRNGWASRMLGGRFQGSNTSQTAGYVDLHTITTMPASGIFTEA-TVSDTTQYRYLRY 562  
*EEU61164* RYVPRAGLEGRMIGGKFGQSNAEDEFSTYTDLATVVAKP-SFTWNCF-DVSSTASFYLYRY 836  
*ABR45148* GYAPRSGYASRLYGGCFQLADNKDFIDPVTFCIDVYDTEYVVSHREVDINKAYRYMRY 552  
\* \* \* \* \*

*CtCBM62* LSP-DGSNGNIAELQFFGTPAG 878  
*CBK73885* LSP-DGSYGNVAEIQFLGAP-- 869  
*ZP\_06143050* LSP-DGGFGNVAEVQFY----- 184  
*ABG59655* VSP-DGGYCNVAELEFY----- 578  
*EEU61164* IGP-EGGVGNIAEIEFYGTP-- 855  
*ABR45148* LSSGTKSNCNISEVEFWGYP-- 571  
\* \* \*

# B

*CtCBM62* 740 -YPKLTGTVIGTQGSWNNIGNT----IHKAFDGDLDNTFFD GPTANGCWLGLDFG-EGVRN 793  
*ABR45148* 466 FRDRMIGGVFEFS-NRTDFGEKDTLFI IQSRPDRLNNTVKSWSDKEYRYIRYVGPNAHC 524  
\* \* \* \* \*

*CtCBM62* 793 VITQIKFCPRSGYEQRMIGGIFQGANKEDFSDAVTLFTITSLPGSGTLTSVDVDNPTGFR 853  
*ABR45148* 525 NVSEIAFYEKN--DTAALSGKIIIGTPGCWEHDGTHEYTN-AFDG-RTWTSFDYSEPTGGW 579  
\* \* \* \* \*

*CtCBM62* 854 YVRYLSPDGSNGNIAELQFFGTPAG 878  
*ABR45148* 580 TGLDLG-----RKIRIDRIVYTPRN 600  
\* \* \*

# C

*CtCBM62* 740 -YPKLTGTVIGTQGSWNNIG-NTIHKAFDGDLDNTFFD GPTANGCWLGLDFGEGVRNVITQIKFCPRSG 797  
*ABR45148* 536 DTAALSGKIIIGTPGCWEHDGTHEYTNAFDGR TWTWTSFDYSEPTGGWTGLDLGRKIR--IDR IVYTPRN-593  
\* \* \* \* \*

*CtCBM62* 798 YEQRMIGGIFQGANKEDFSDAVTLFTITSLPGSGTLTSVDVDNPTGFRYVRY 849  
*ABR45148* 466 FRDRMIGGVFEFSNRTDFGEKDTLFI IQSRPDR-LNNTVKSWSDKEYRYIRY 516  
\* \* \* \* \*

*CtCBM62* 850 LSPDGSNGNIAELQFFGTPAG 878  
*ABR45148* 517 VGPPNAHCNVSEIAFYEKN-- 535  
\* \* \*

Figure 2S
